# Supplementary material
Source: Copernicus journal article supplement (doi:10.5194/acp-26-5679-2026)
Supplement: Supplementary file 1 [file acp-26-5679-2026-supplement.pdf]

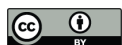

*Supplement of*

## **The radiative forcing of PM<sub>2.5</sub> heavy pollution, its influencing factors and importance to precipitation during 2014–2023 in the Bohai Rim, China**

**Jun Zhu et al.**

*Correspondence to:* Xu Yue (yuexu@nuist.edu.cn) and Huizheng Che (chehz@cma.ac.cn)

The copyright of individual parts of the supplement might differ from the article licence.

## Supplementary file

**Table S1.** Site information of 11 ground-observed stations

| Regions                        | Station name | Station Abbr. | Longitude(°E) | latitude(°N) |
|--------------------------------|--------------|---------------|---------------|--------------|
| West of the Bohai<br>Sea (BLT) | Beijing      | BJ            | 116.398       | 40.046       |
|                                | Langfang     | LF            | 116.724       | 39.546       |
|                                | Tianjin      | TJ            | 117.324       | 39.100       |
| North of the Bohai<br>Sea (NB) | Tangshan     | TS            | 118.183       | 39.645       |
|                                | Qinghuangdao | QHD           | 119.607       | 39.936       |
|                                | Huludao      | HLD           | 120.865       | 40.738       |
|                                | Dalian       | DL            | 121.628       | 38.950       |
| South of the Bohai<br>Sea (SB) | Cangzhou     | CZ            | 116.872       | 38.316       |
|                                | Dongying     | DY            | 118.654       | 37.431       |
|                                | Yantai       | YT            | 121.406       | 37.488       |
|                                | Weihai       | WH            | 122.093       | 37.490       |

**Table S2.** The essential statistical metrics of the evaluation of Random Forest training models.

| Statistical<br>metrics | RF<br>surface<br>clear | RF<br>surface<br>all | RF<br>TOA<br>clear | RF TOA<br>all | RF<br>Atmos<br>clear | RF<br>Atmos<br>all | Total<br>pre |
|------------------------|------------------------|----------------------|--------------------|---------------|----------------------|--------------------|--------------|
| R <sup>2</sup>         | 0.6721                 | 0.6722               | 0.6852             | 0.6512        | 0.6557               | 0.6742             | 0.5728       |
| RMSE                   | 0.5697                 | 0.5697               | 0.5562             | 0.5881        | 0.5837               | 0.5683             | 0.6454       |
| MAE                    | 0.4277                 | 0.4291               | 0.3921             | 0.4381        | 0.4442               | 0.4416             | 0.2410       |

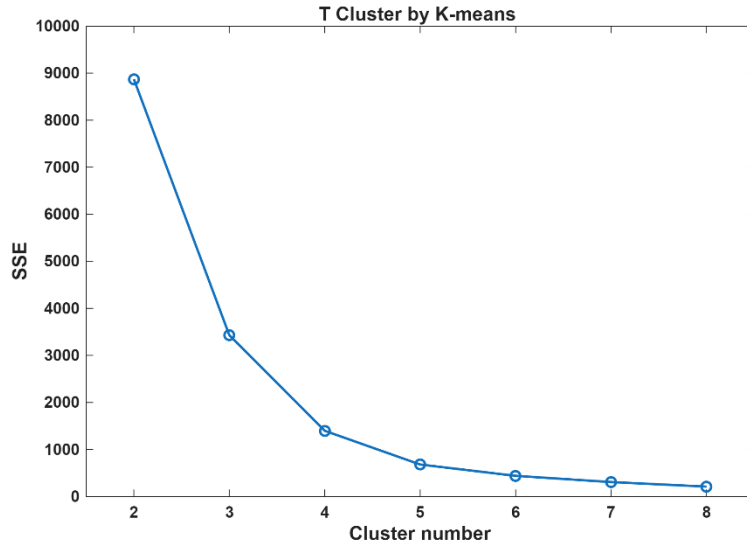

**Figure S1.** The Sum of Squared Errors (SSE) of k-means clustering of T using the cluster numbers from 2 to 8. The number 5 is nearing the “elbow point” where adding more clusters yields diminishing returns in reducing within-cluster variance.

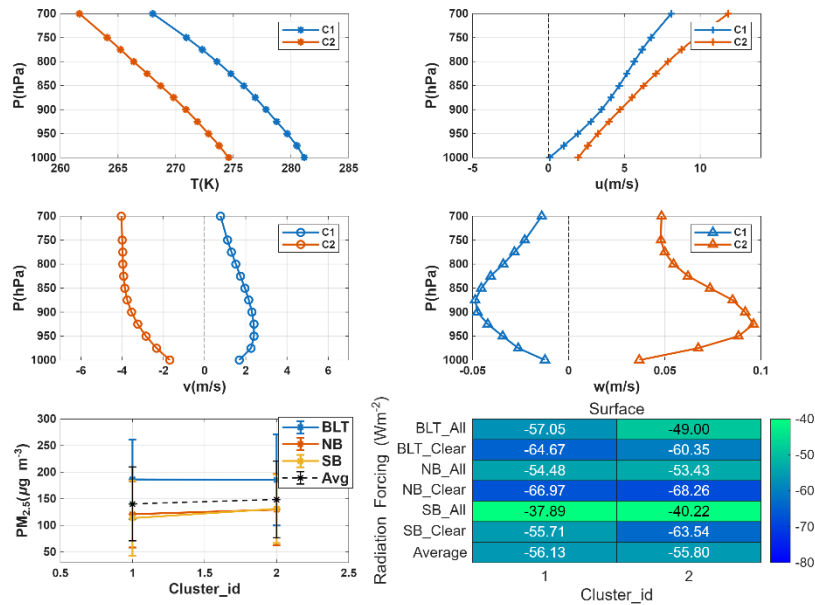

**Figure S2.** The results of clustering of combined T and winds by the k-means algorithm using the elbow method to determine the number of clusters of 2 (this clustering of 2 is distinct for temperature and winds, but failed to capture the temperature inversion layers).

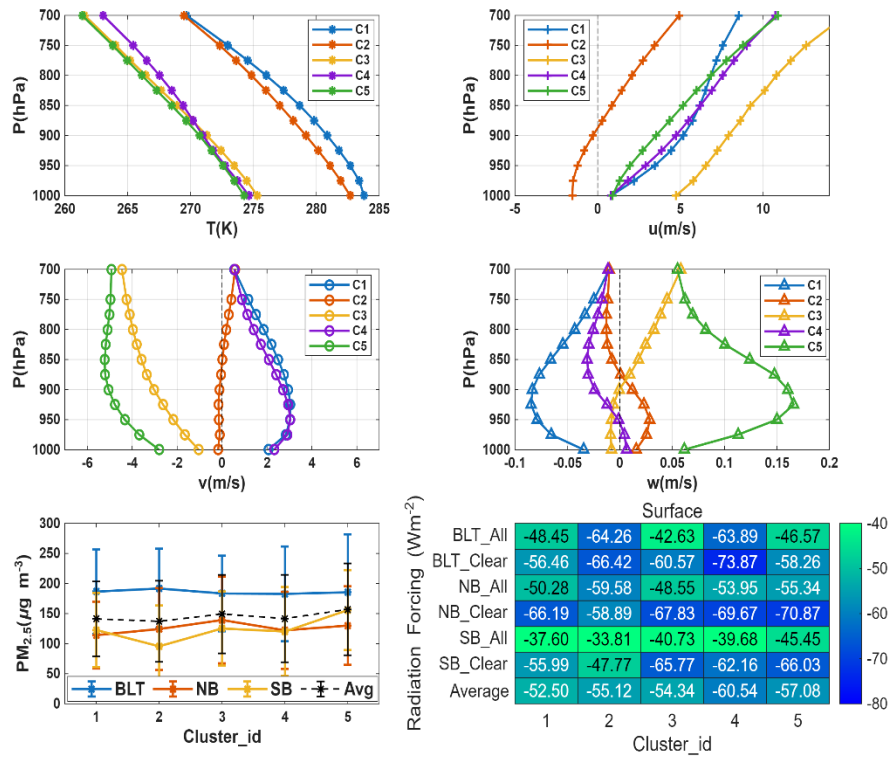

**Figure S3.** The results of clustering of combined T and winds by the k-means algorithm using the same number of clusters in the manuscript of 5 (this clustering of 5 also failed to capture the temperature inversion layers).

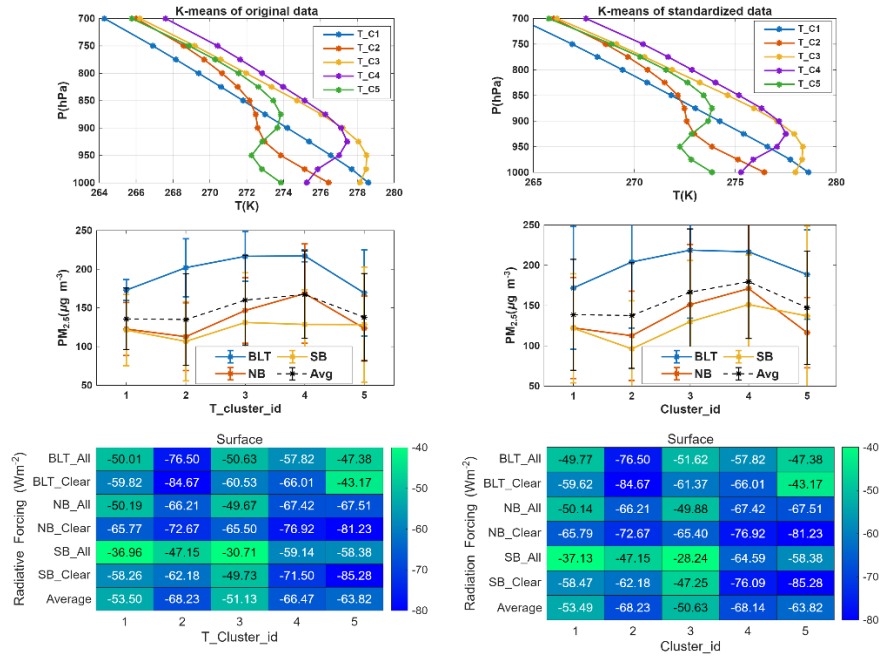

**Figure S4.** The comparison of k-means clustering by using original data and standardized data (Z-score of T).

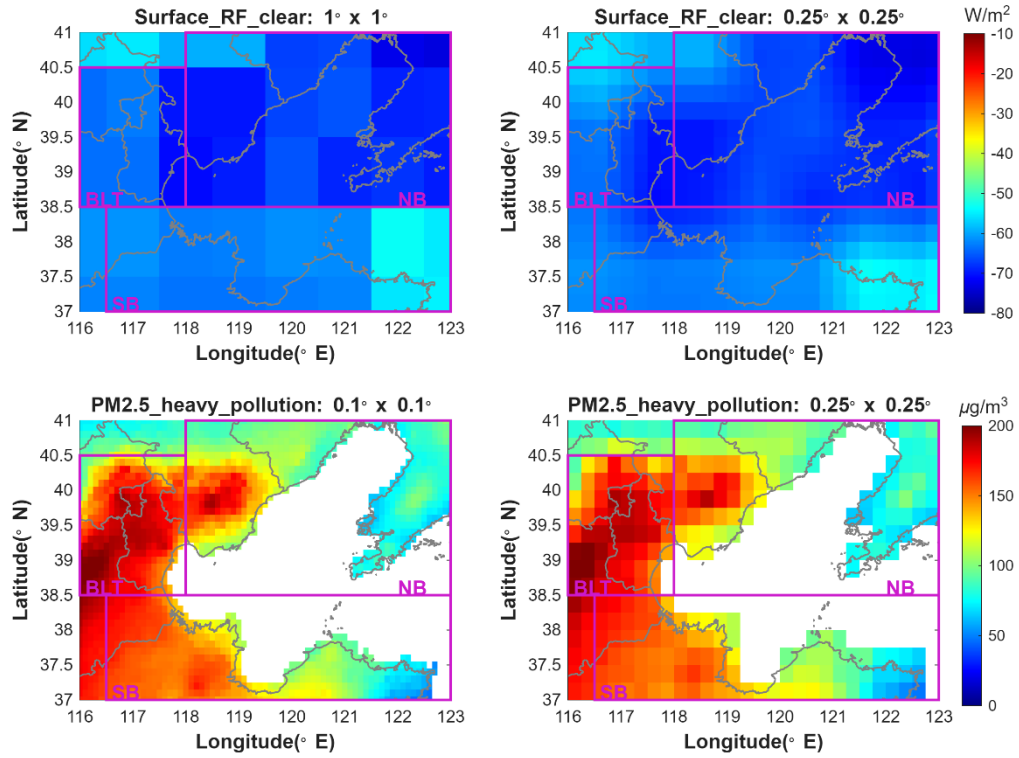

**Figure S5.** The comparison between the original data (first column) and the interpolated data (second column) in the study area. The first row is the radiative forcing (RF) from CERES at the surface in clear sky, and the second row is the interpolation for the PM<sub>2.5</sub> from TAP. The purple rectangle indicates the three regions.

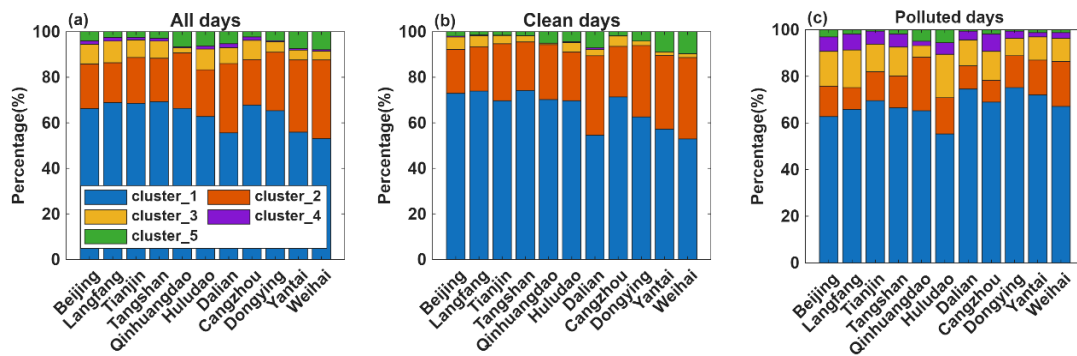

**Figure S6.** Proportions of different temperature profile types (C1: decreasing, C2: decreasing with isotherms, C3: low-altitude inversion, C4: mid-altitude inversion, and C5: upper-altitude inversion) on all days (a), regional clean days (b), and regional heavy polluted days (c) at each station during autumn and winter 2014-2023.

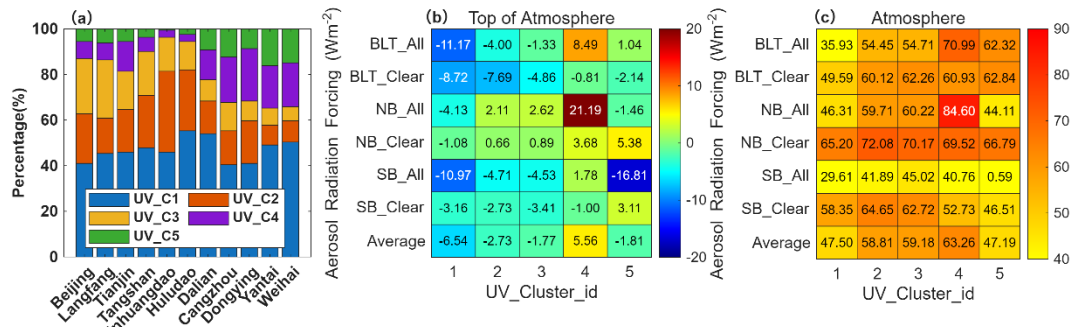

**Figure S7.** The percentage statistics at the 11 stations (a) and radiative forcing in the three regions in clear- and all-sky at the top of the atmosphere (b), and in the atmosphere (c) at the five horizontal wind clusters.

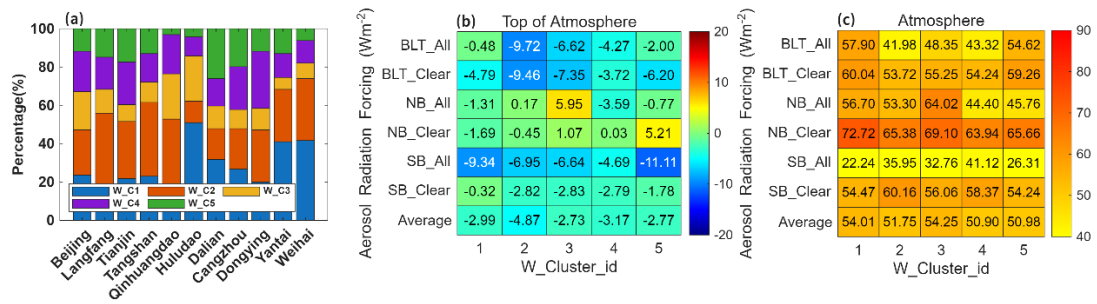

**Figure S8.** The percentage statistics at the 11 stations (a) and radiative forcing in the three regions in clear- and all-sky at the top of the atmosphere (b), and in the atmosphere (c) at the five vertical wind clusters.
